# Supplementary material
Source: PubMed Central journal article supplement (PMC3916218)
Supplement: NIHMS520335-supplement-2.pdf [file NIHMS520335-supplement-2.pdf]

ICAM-1 Kilifi SNP

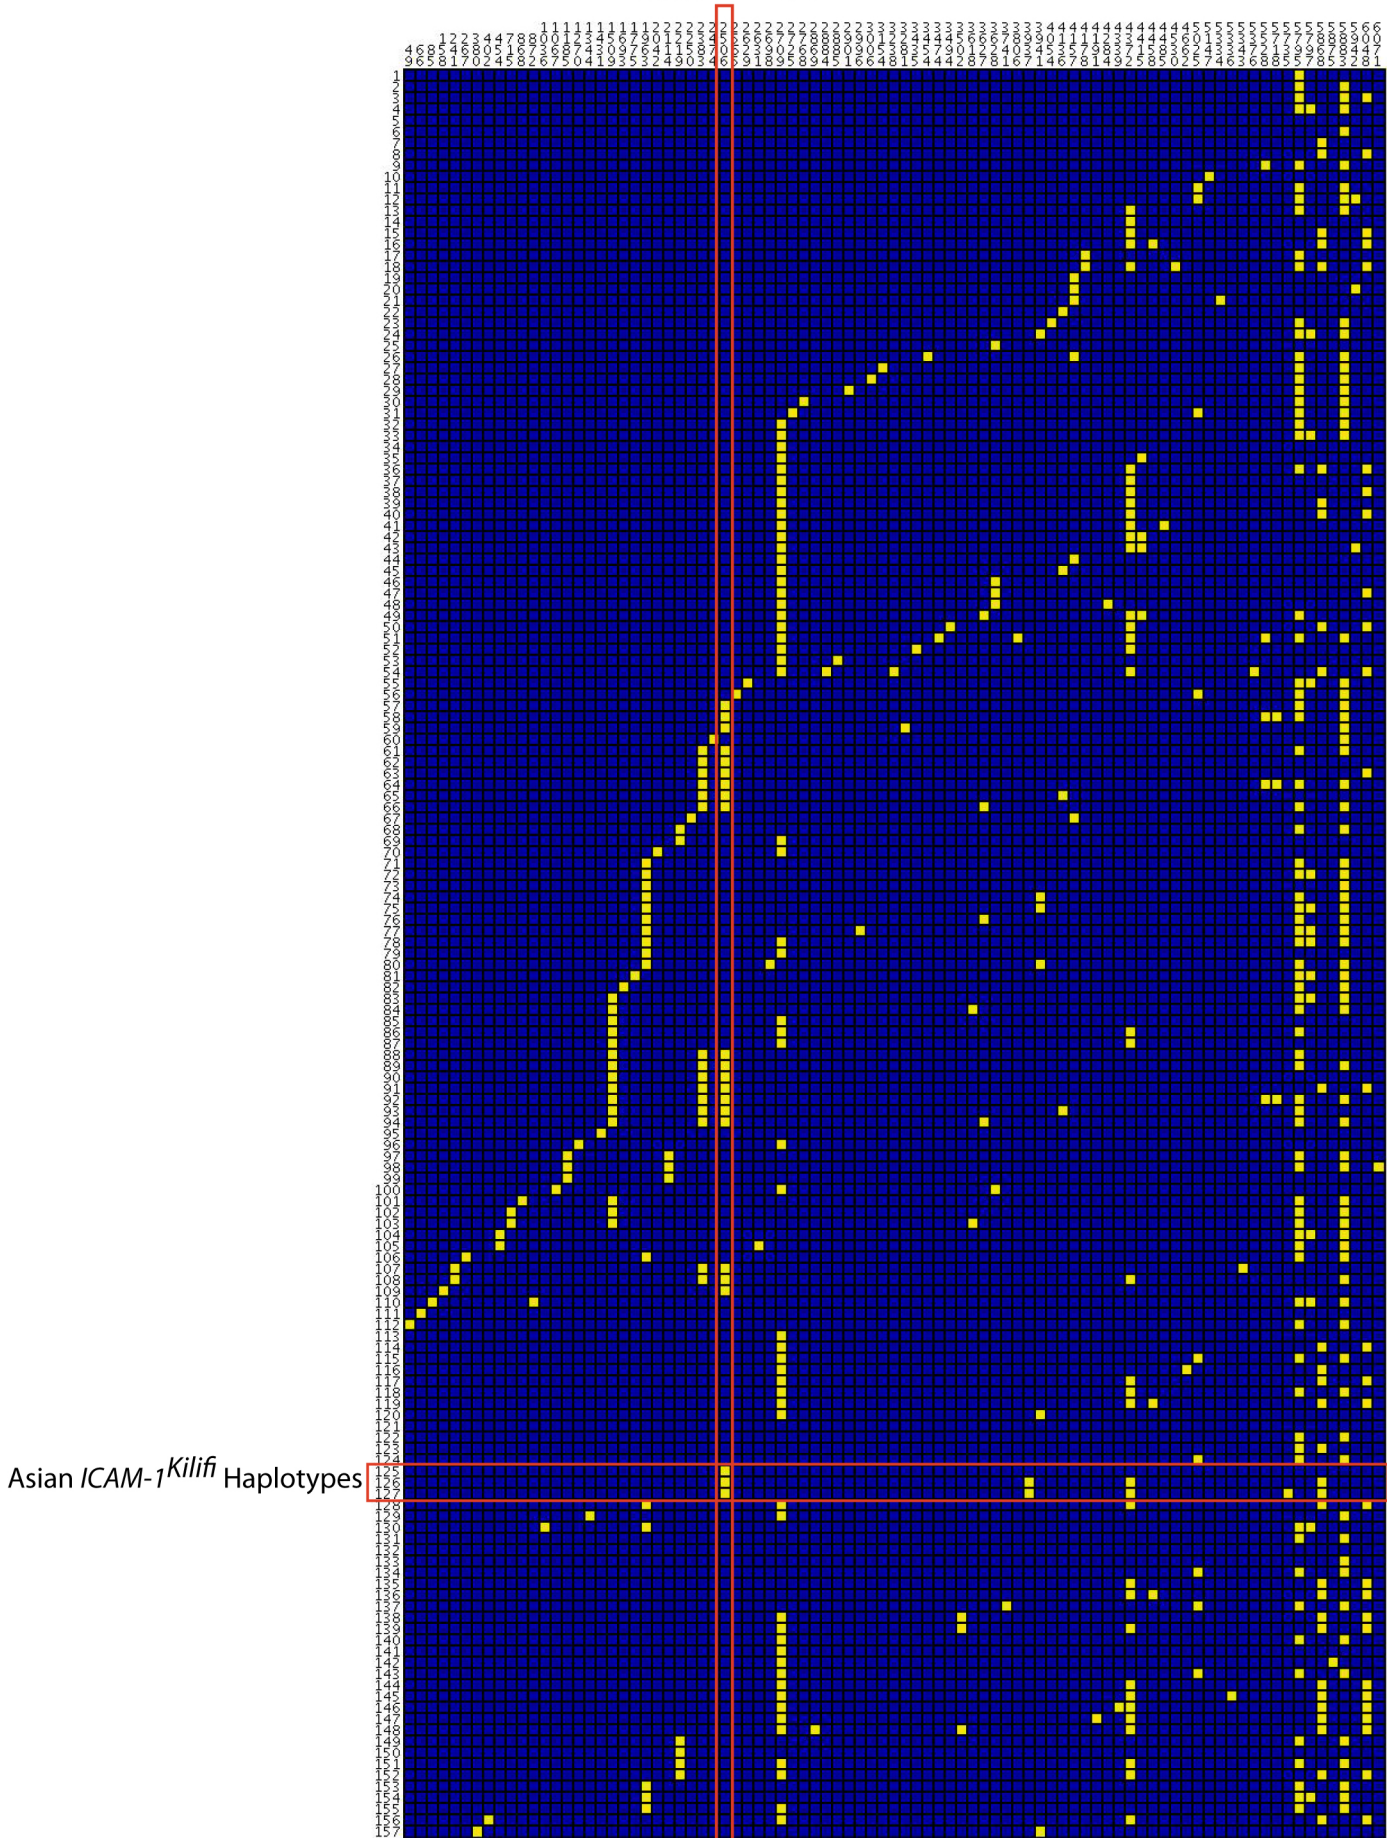

Patterns of Nucleotide and Haplotype Diversity at ICAM-1 Across Global Human Populations with Varying Levels of Malaria Exposure  
 Submitted to: Human Genetics

Felicia Gomez, Gil Tomas, Wen-Ya Ko, Alessia Ranciaro, Alain Froment, Muntaser Ibrahim, Godfrey Lema, Thomas B. Nyambo, Sabah A. Omar, Charles Wambebe, Jibril B. Hirbo, Jorge Rocha, and Sarah A. Tishkoff<sup>1,\*</sup>

<sup>1</sup> Department of Genetics and Biology, School of Medicine and School of Arts and Sciences, University of Pennsylvania

\*Correspondence: tishkoff@mail.med.upenn.edu
