# Supplementary material
Source: PubMed Central journal article supplement (PMC3916218)
Supplement: NIHMS520335-supplement-5.pdf [file NIHMS520335-supplement-5.pdf]

Supplemental Table 3

a All Humans

|                   | Synonymous substitutions | Non-synonymous substitutions |
|-------------------|--------------------------|------------------------------|
| Polymorphic Sites | 9                        | 21                           |
| Fixed Differences | 5                        | 18                           |
| $r_{pd}$          | 1.8                      | 1.17                         |

b Africans

|                   | Synonymous substitutions | Non-synonymous substitutions |
|-------------------|--------------------------|------------------------------|
| Polymorphic Sites | 7                        | 19                           |
| Fixed Differences | 5                        | 18                           |
| $r_{pd}$          | 1.4                      | 1.06                         |

c Non-Africans

|                   | Synonymous substitutions | Non-synonymous substitutions |
|-------------------|--------------------------|------------------------------|
| Polymorphic Sites | 2                        | 5                            |
| Fixed Differences | 5                        | 18                           |
| $r_{pd}$          | 0.4                      | 0.28                         |

Manuscript Information:

Patterns of Nucleotide and Haplotype Diversity at ICAM-1 Across Global Human Populations with Varying Levels of Malaria Exposure

Submitted to: Human Genetics

Felicia Gomez, Gil Tomas, Wen-Ya Ko, Alessia Ranciaro, Alain Froment, Muntaser Ibrahim, Godfrey Lema, Thomas B. Nyambo, Sabah A. Omar, Charles Wambebe, Jibril B. Hirbo, Jorge Rocha, and Sarah A. Tishkoff<sup>1,\*</sup>

<sup>1</sup> Department of Genetics and Biology, School of Medicine and School of Arts and Sciences, University of Pennsylvania

\*Correspondence: [tishkoff@mail.med.upenn.edu](mailto:tishkoff@mail.med.upenn.edu)
