# Supplementary material
Source: PubMed Central journal article supplement (PMC3916218)
Supplement: NIHMS520335-supplement-6.pdf [file NIHMS520335-supplement-6.pdf]

Supplemental Table 4

| SNP position | r <sup>2</sup> | r <sup>2</sup> p-value |                                             |
|--------------|----------------|------------------------|---------------------------------------------|
| 3581         | 0.613          | 0.001                  | * linked to <i>ICAM-1</i> <sup>Kilifi</sup> |
| -9           | 0.578          | 0.001                  | * linked to <i>ICAM-1</i> <sup>Kilifi</sup> |
| 3704         | 0.565          | 0.001                  | <i>ICAM-1</i> <sup>Kilifi</sup>             |
| 13081        | 0.525          | 0.002                  | Top 5% of distributions                     |
| 13416        | 0.376          | 0.015                  |                                             |
| 15387        | 0.314          | 0.030                  |                                             |
| 701          | 0.313          | 0.030                  |                                             |
| 13933        | 0.313          | 0.030                  |                                             |
| -333         | 0.300          | 0.035                  |                                             |
| 596          | 0.300          | 0.035                  |                                             |
| 14500        | 0.268          | 0.048                  |                                             |
| 15567        | 0.248          | 0.059                  |                                             |
| 175          | 0.230          | 0.071                  |                                             |
| 13529        | 0.230          | 0.071                  |                                             |
| 3829         | 0.220          | 0.078                  |                                             |
| -1067        | 0.217          | 0.080                  |                                             |
| 15197        | 0.217          | 0.080                  |                                             |
| 13632        | 0.210          | 0.086                  |                                             |
| 13082        | 0.207          | 0.089                  |                                             |
| 445          | 0.185          | 0.109                  |                                             |
| 13890        | 0.165          | 0.133                  |                                             |
| 13611        | 0.154          | 0.148                  |                                             |
| 15297        | 0.125          | 0.196                  |                                             |
| 3907         | 0.085          | 0.292                  |                                             |
| 15295        | 0.083          | 0.297                  |                                             |
| 13847        | 0.056          | 0.397                  |                                             |
| -805         | 0.042          | 0.461                  |                                             |
| 13653        | 0.032          | 0.527                  |                                             |

Manuscript Information:

Patterns of Nucleotide and Haplotype Diversity at ICAM-1 Across Global Human Populations with Varying Levels of Malaria Exposure

Submitted to: Human Genetics

Felicia Gomez, Gil Tomas, Wen-Ya Ko , Alessia Ranciaro, Alain Froment, Muntaser Ibrahim, Godfrey Lema, Thomas B. Nyambo, Sabah A. Omar, Charles Wambebe, Jibril B. Hirbo, Jorge Rocha, and Sarah A. Tishkoff<sup>1,\*</sup>

1 Department of Genetics and Biology, School of Medicine and School of Arts and Sciences,  
University of Pennsylvania

\*Correspondence: [tishkoff@mail.med.upenn.edu](mailto:tishkoff@mail.med.upenn.edu)
