# Supplementary material
Source: PubMed Central journal article supplement (PMC3916218)
Supplement: NIHMS520335-supplement-7.pdf [file NIHMS520335-supplement-7.pdf]

Supplemental Table 5

| <b>Fragment</b> | <b>Forward (5'-3')</b>         | <b>Reverse (5'-3')</b>     |
|-----------------|--------------------------------|----------------------------|
| Region I        | AGA AAA GAA CGG CAC CAT TG     | CTG GGG CTC CTA AAG TGT TG |
| Region II       | CCT GTC ACC AAA GCA CTG TC     | AAC CCC TGG GTT AAA GCA AT |
| Region III      | GGG CCC TCT TAC CAG CAG TTT TC | CCA GGC CTC ATT AGA AAC CA |

Manuscript Information:

Patterns of Nucleotide and Haplotype Diversity at ICAM-1 Across Global Human Populations with Varying Levels of Malaria Exposure

Submitted to: Human Genetics

Felicia Gomez, Gil Tomas, Wen-Ya Ko , Alessia Ranciaro, Alain Froment, Muntaser Ibrahim, Godfrey Lema, Thomas B. Nyambo, Sabah A. Omar, Charles Wambebe, Jibril B. Hirbo, Jorge Rocha, and Sarah A. Tishkoff<sup>1,\*</sup>

<sup>1</sup> Department of Genetics and Biology, School of Medicine and School of Arts and Sciences, University of Pennsylvania

\*Correspondence: [tishkoff@mail.med.upenn.edu](mailto:tishkoff@mail.med.upenn.edu)
